# Supplementary material for: Sunlight assisted degradation of a pollutant dye in water by a WO3@g-C3N4 nanocomposite catalyst
Source: Royal Society of Chemistry journal article supplement (doi:10.1039/c9nj05142b), 2020-01-01
Supplement: c9nj05142b1.pdf [file c9nj05142b1.pdf]

## Electronic Supplementary information

### Sun Light Assisted Degradation of Pollutant dye in water by $\text{WO}_3@g\text{-C}_3\text{N}_4$

#### Nanocomposite Catalyst

Sukanya Borthakur<sup>a,b</sup>, Purashri Basyach<sup>a,b</sup>, Lisamoni Kalita<sup>a,b</sup>, Karanika Sonowal<sup>a,b</sup>,  
Amritanjali Tiwari,<sup>c</sup> Pubali Chetia<sup>a,b</sup> and Lakshi Saikia<sup>\*a,b</sup>

<sup>a</sup> Materials Science and Technology Division, CSIR-North East Institute of Science and Technology, Jorhat - 785006, Assam, India

<sup>b</sup> Academy of Scientific and Innovative Research, New Delhi, India

<sup>c</sup> Department of Energy & Environmental Engineering

CSIR - Indian Institute of Chemical Technology, Tarnaka, Uppal Road, Hyderabad - 500 007

\*Tel: +91 9957031635. Fax: +91 0376 2370011. E-mail:l.saikia@gmail.com

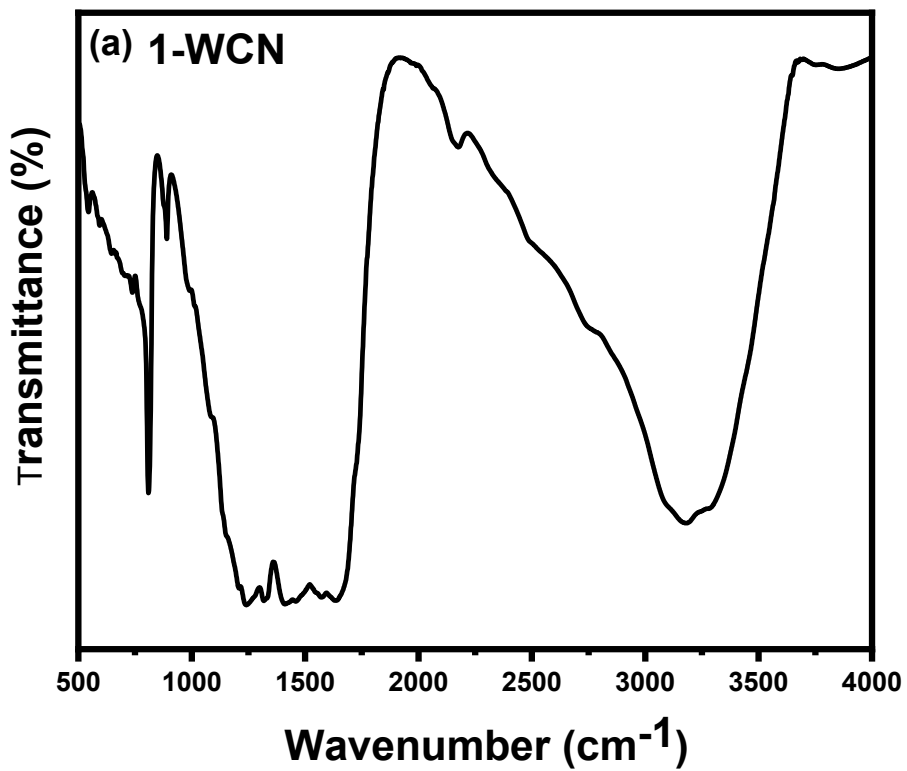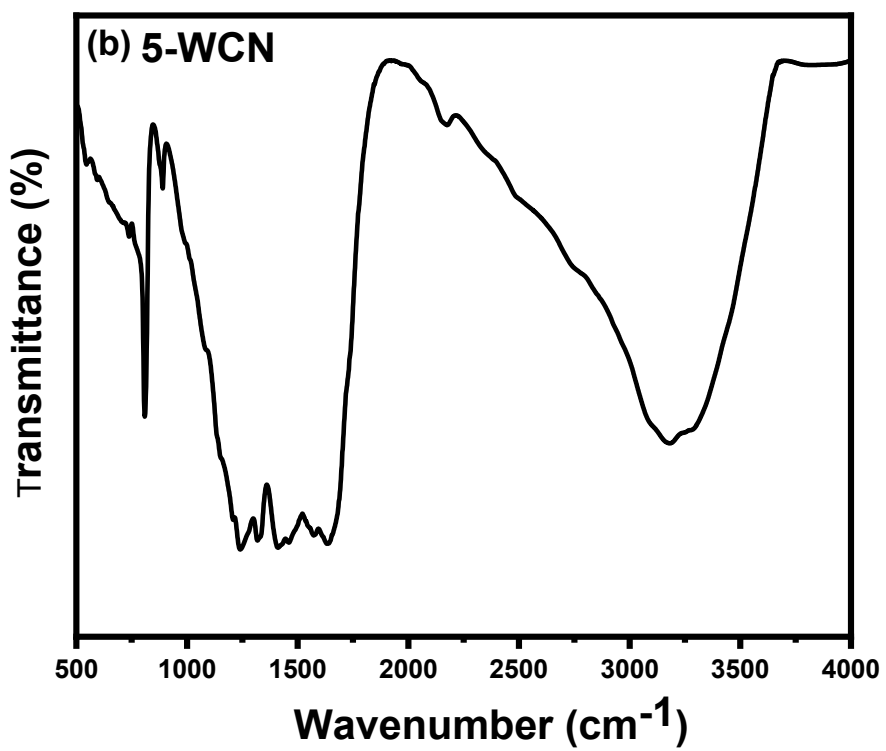

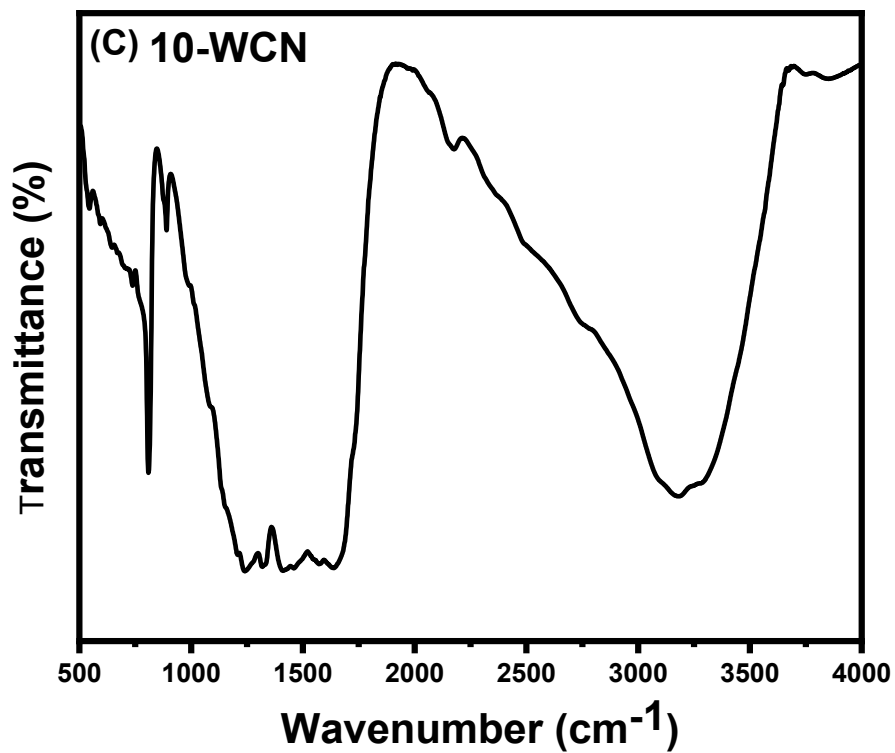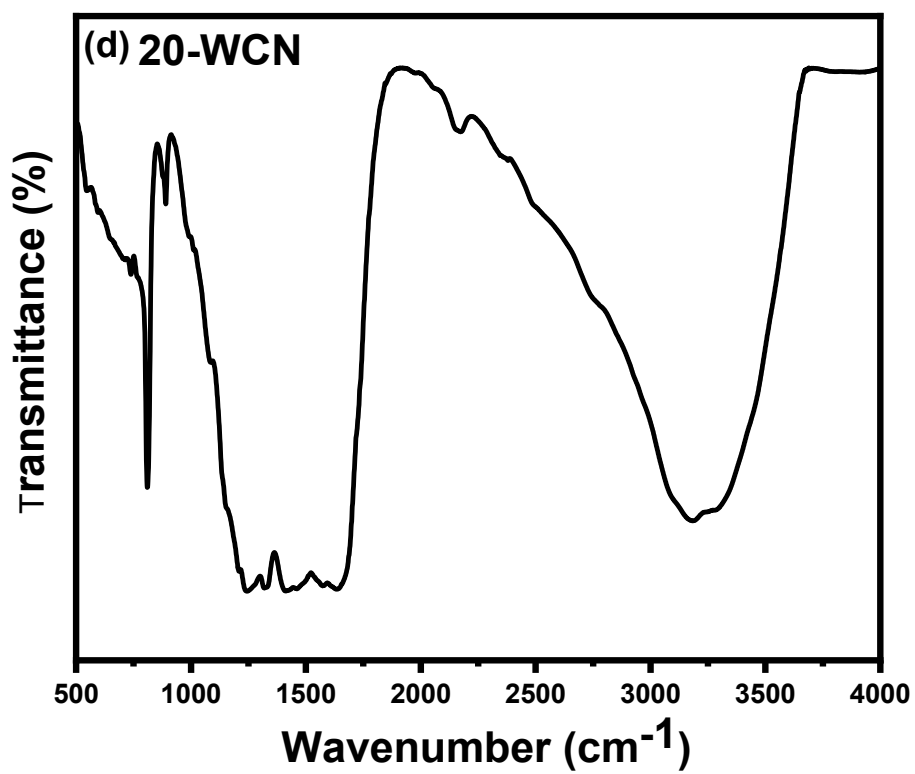

Figure S1. FT-IR spectra of (a) 1-WCN (b) 5-WCN (c) 10-WCN (d) 20-WCN nanocomposites.

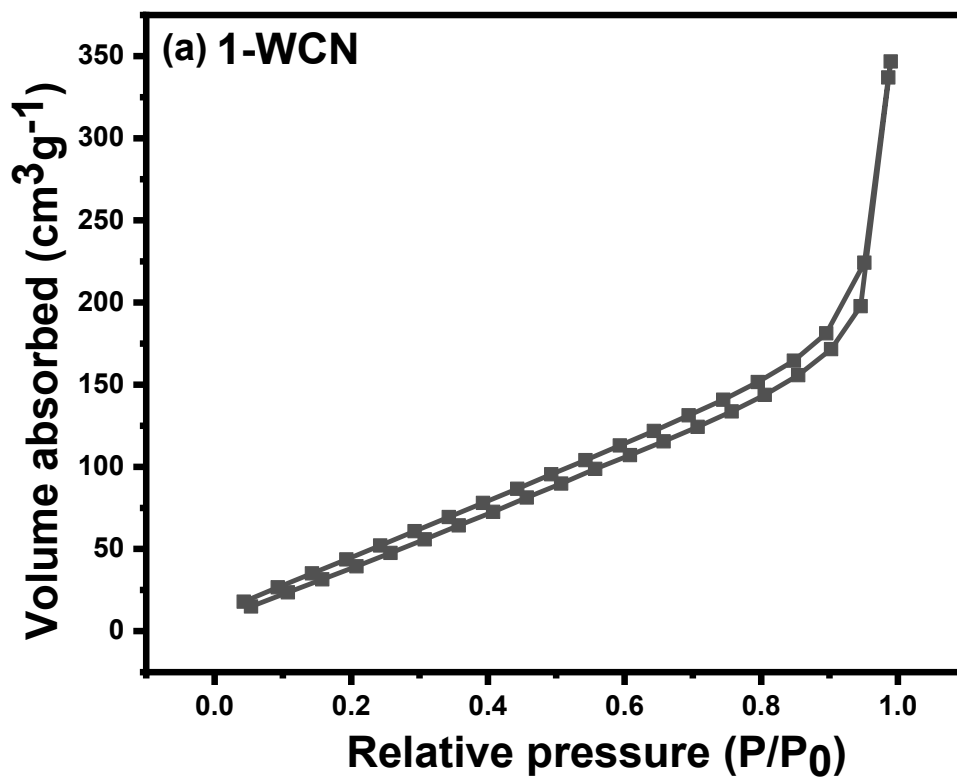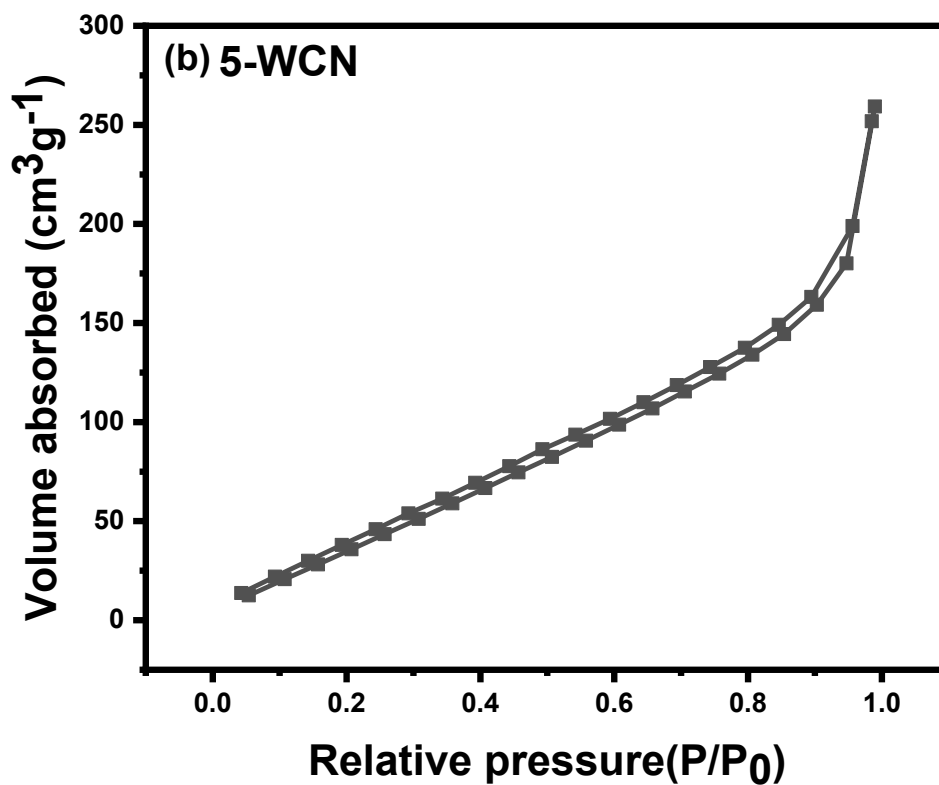

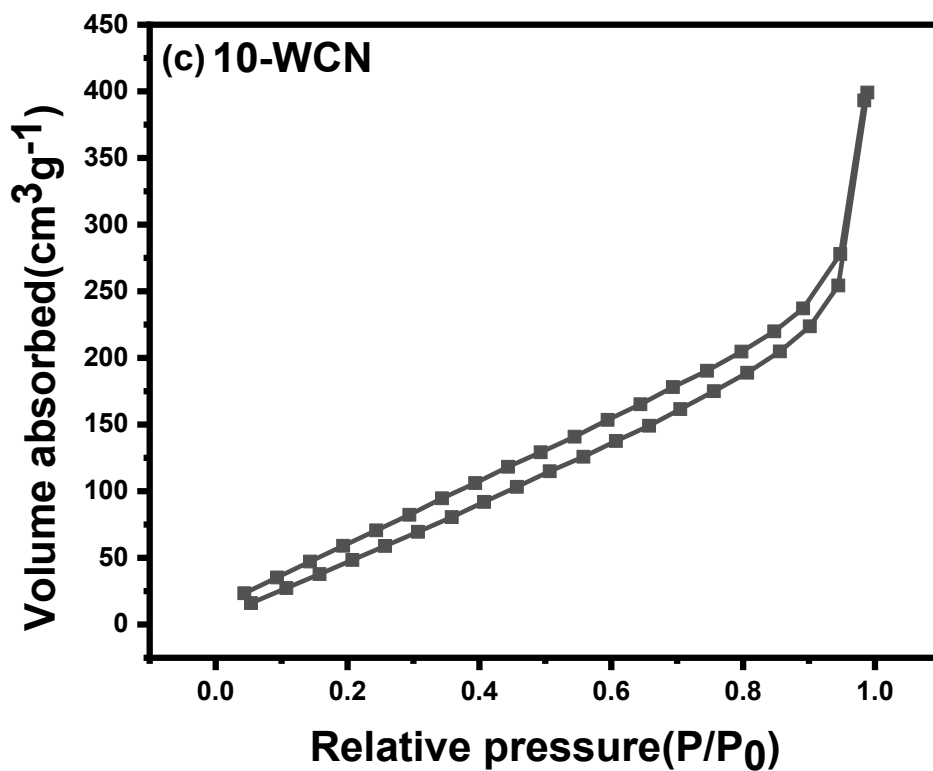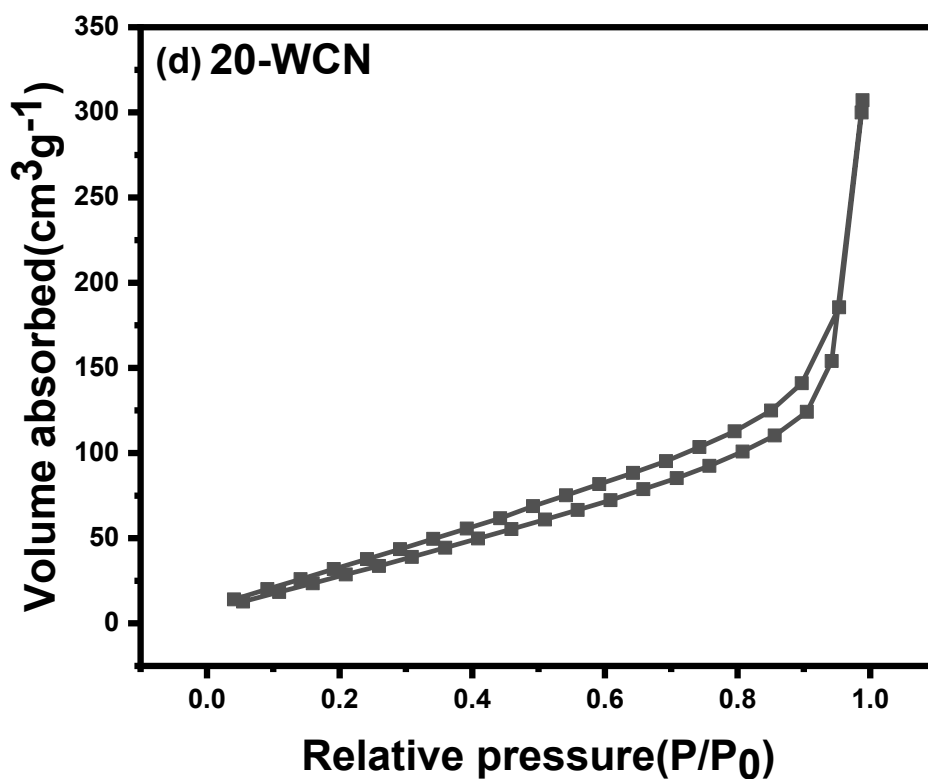

**Figure S2.** Nitrogen adsorption-desorption isotherm plots of (a) 1-WCN (b) 5-WCN (c) 10-WCN (d) 20-WCN nanocomposites.

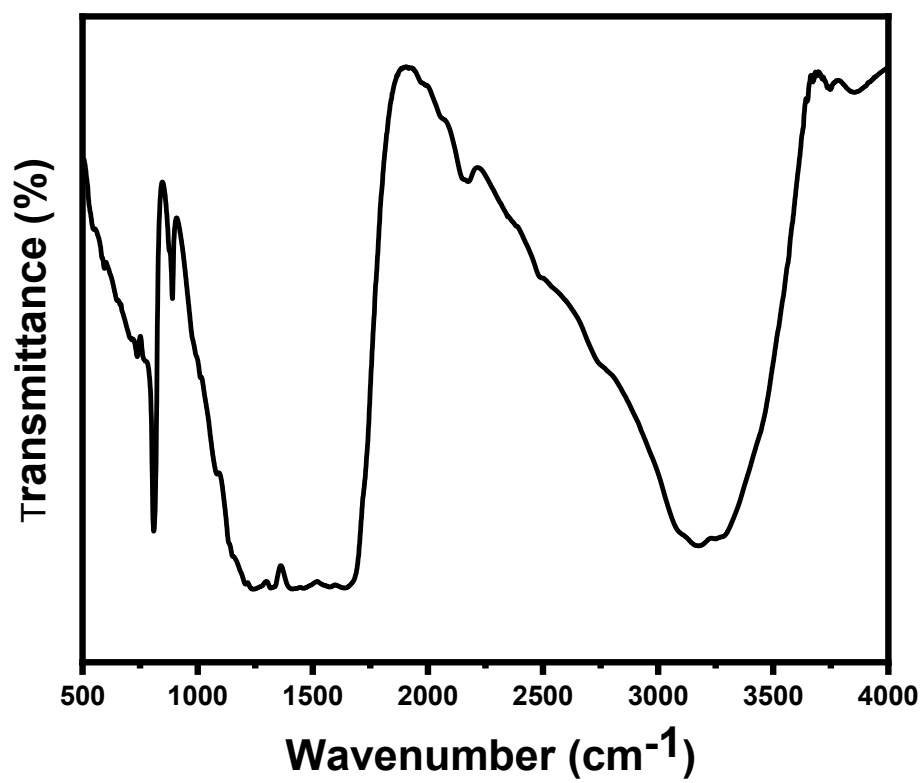

**Figure S3.** FT-IR spectra of recovered 2-WCN nanocomposites.

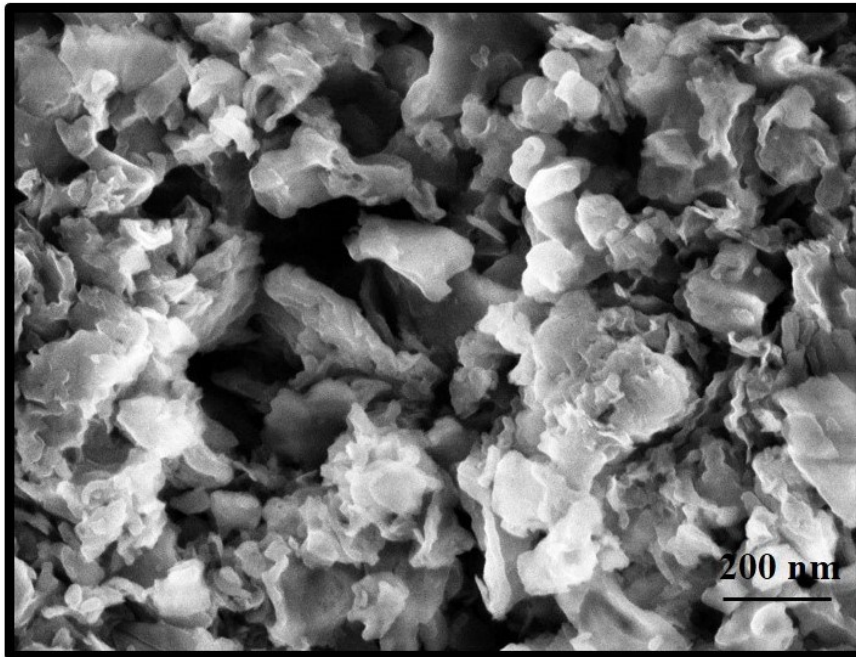

**Figure S4.** FE-SEM image of recovered 2-WCN nanocomposites.

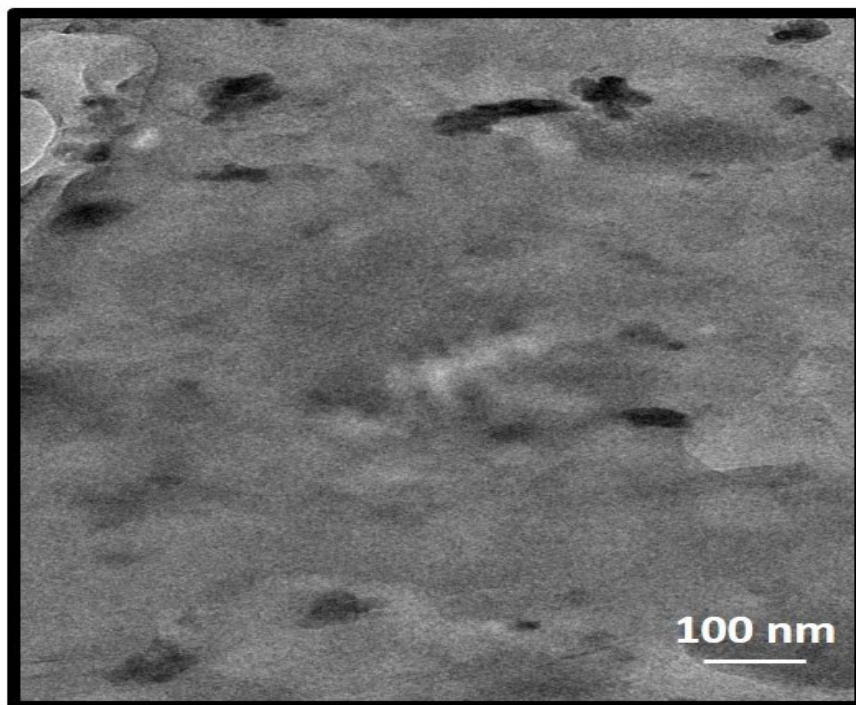

**Figure S5.** TEM image of recovered 2-WCN nanocomposites.

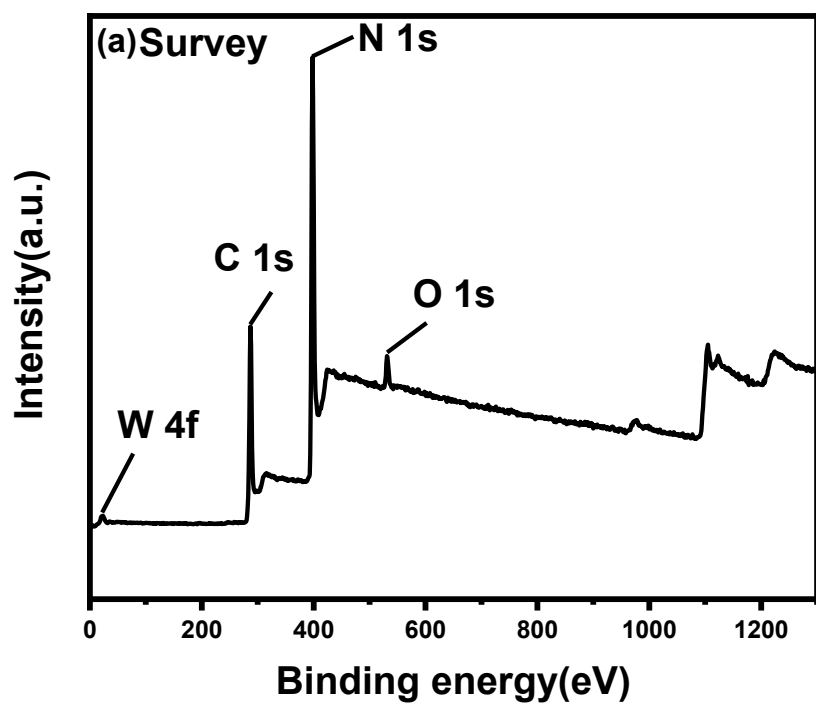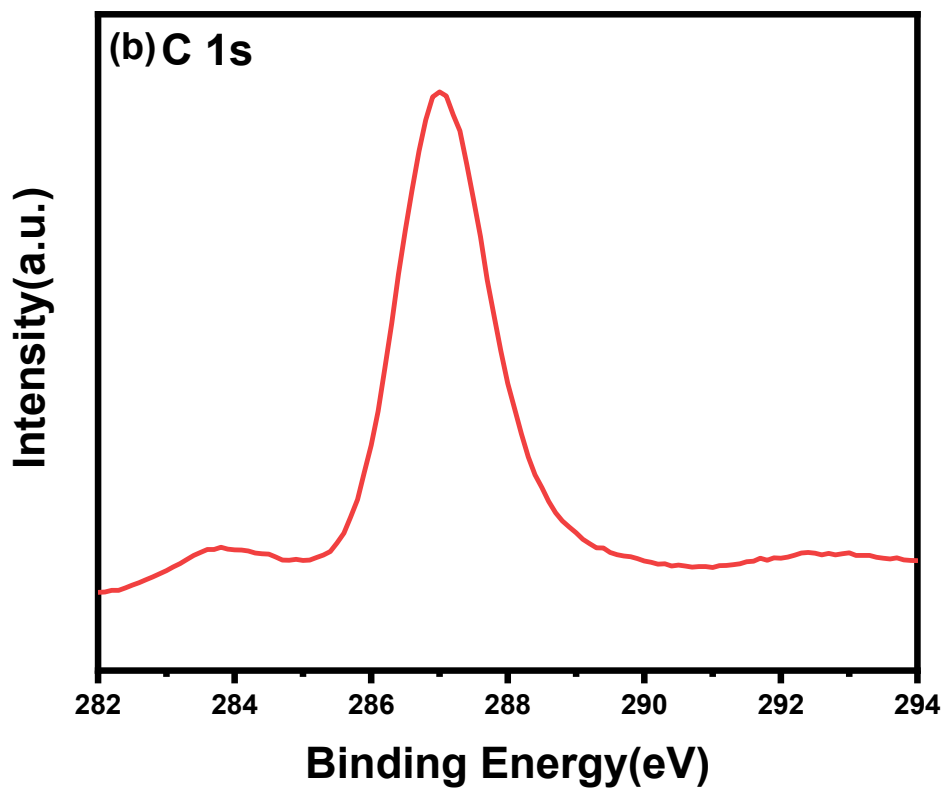



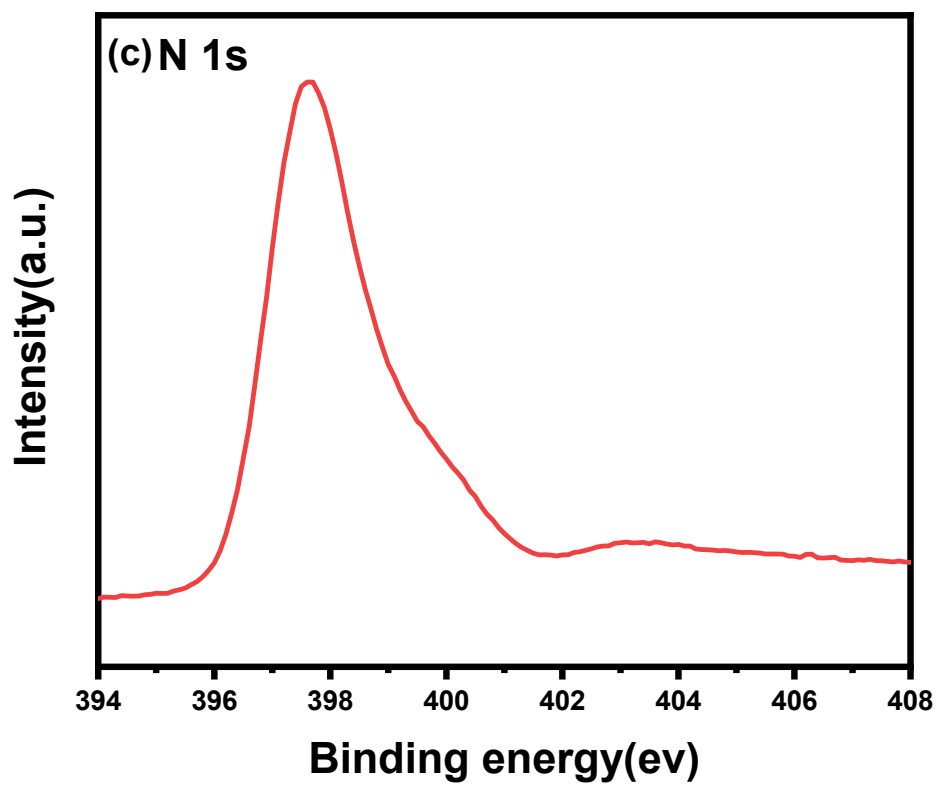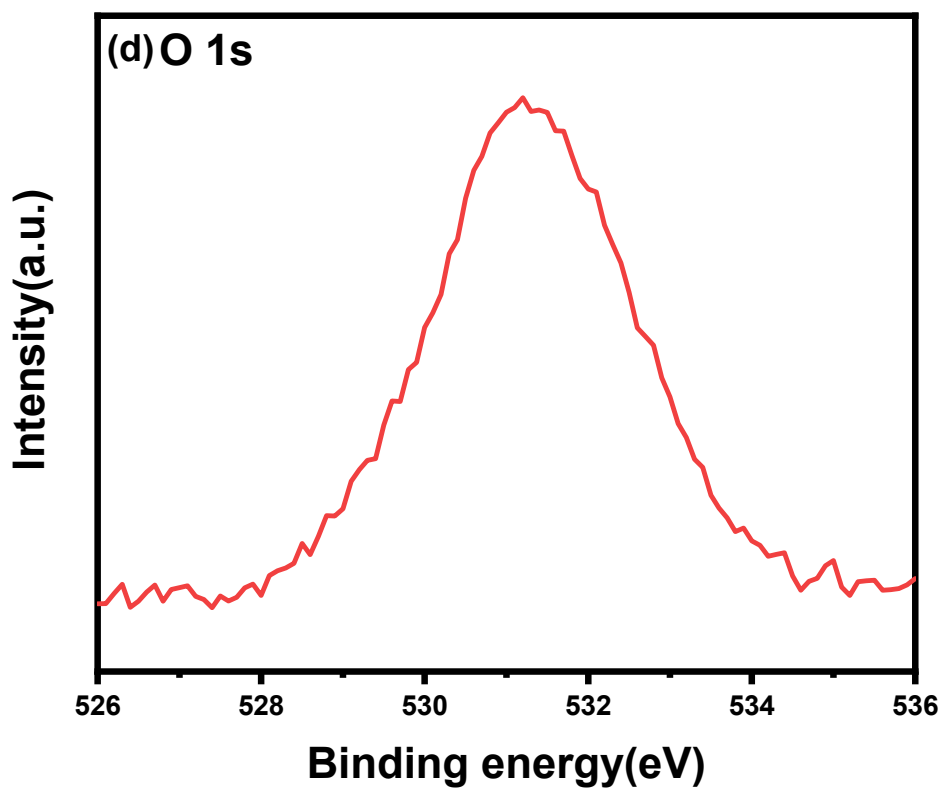

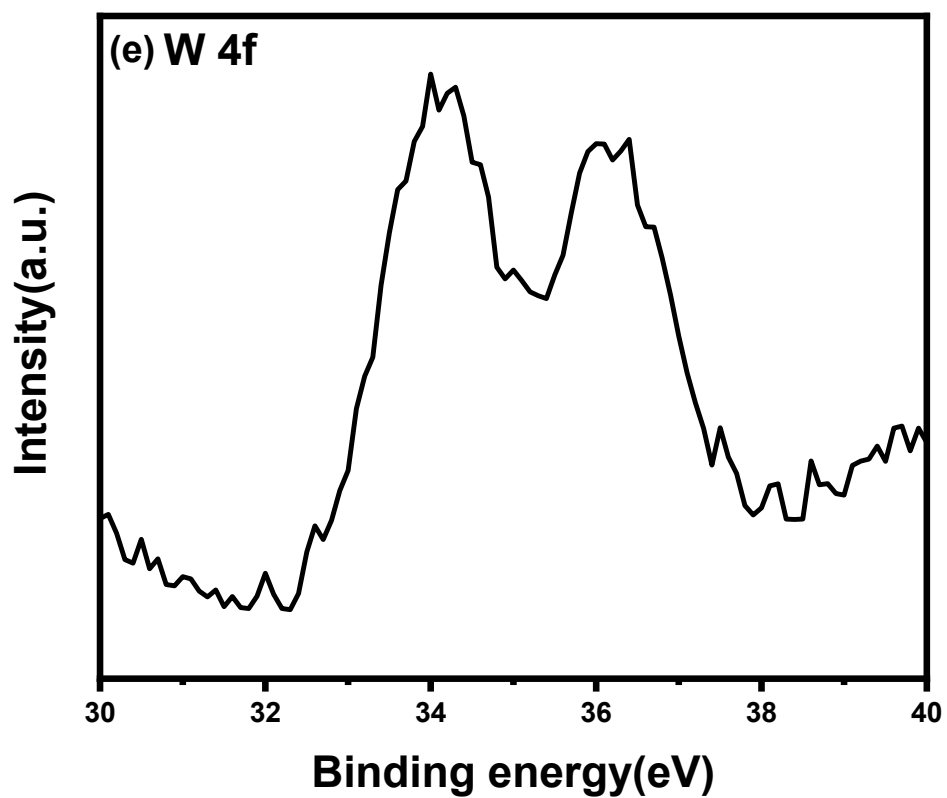

**Figure S6.** (a) XPS survey, (b) C 1s XPS spectra, (c) N 1s XPS spectra, (d) O 1s XPS spectra, (e) W 4f XPS spectra of recovered 2-WCN nanocomposites.

**Table S1: BET surface areas of as-prepared samples**

| <b>Samples</b>                  | <b>BET Surface area (m<sup>2</sup> g<sup>-1</sup>)</b> |
|---------------------------------|--------------------------------------------------------|
| g-C <sub>3</sub> N <sub>4</sub> | 98.4                                                   |
| WO <sub>3</sub>                 | 279.5                                                  |
| 1-WCN                           | 233.4                                                  |
| 2-WCN                           | 230.5                                                  |
| 5-WCN                           | 223.8                                                  |
| 10-WCN                          | 186.8                                                  |
| 20-WCN                          | 147.9                                                  |
